# Supplementary material
Source: Springer Nature journal article supplement (https://www.springermedizin.de/resource/supplementary/12981_2011_213_MOESM1_ESM.pdf/9604068)

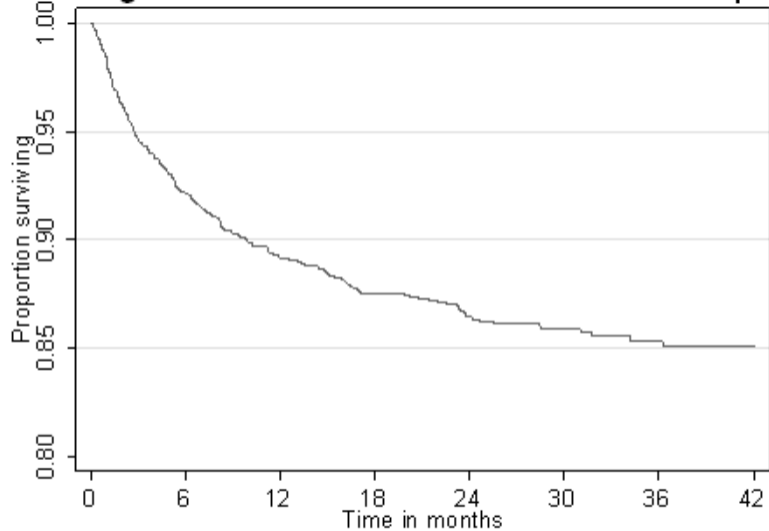

Number at risk

1453

1296

1168

1061

872

581

314

84

Supplement: MOESM1 [file 9604068]
